# Supplementary material for: French General Practitioners’ Adaptations for Patients with Suspected COVID-19 in May 2020
Source: MDPI journal article supplement (doi:10.3390/ijerph20031896), 2023-01-19
Supplement: s1 [file s1]

**Supplementary material Table S1.** List of the members of the Assembler, Coordonner, Comprendre, Rechercher, Débattre en soins primaires) network (ACCORD) and their partners.

| <b>Members of the ACCORD (Assembler, Coordonner, Comprendre, Rechercher, Débattre en soins primaires) network</b> | <b>Partners of the ACCORD network who also sent the survey link:</b>      |
|-------------------------------------------------------------------------------------------------------------------|---------------------------------------------------------------------------|
| National College of Academic GPs (CNGE)                                                                           | French Society of General Medicine (SFTG)                                 |
| SPP-IR association (Multidisciplinarity in Primary Care, Innovation and Research)                                 | National College of General Practice (CMG)                                |
| French Society of General Practice (SFMG)                                                                         | French Society of Documentation and Research in General Practice (SFDRMG) |
| National Federation of Multidisciplinary Groups (AVECSanté)                                                       | French Society of General Practice (SFMG)                                 |
| Research Institute of Healthcare Centres (IJFR)                                                                   | French Association of Young Researchers in General Practice (FAYR-GP)     |
| RETINES (Risk, Epidemiology, Territory, INformation, Education in health) Unit, Côte d'Azur University            |                                                                           |
| National Association of Health Teams in Primary Care (ASALEE)                                                     |                                                                           |
| RESPIRE project (EHESP)                                                                                           |                                                                           |
| Midwifery Department of Versailles Saint Quentin University                                                       |                                                                           |

**Supplementary material Table S2.** Practice locations of the survey participants (n=3,068), compared with the general practitioners' (GPs) population in metropolitan France in 2019.

|                             | Responding GPs,<br>n=3,068 | All GPs in<br>metropolitan France <sup>1</sup> ,<br>n=53,339 |
|-----------------------------|----------------------------|--------------------------------------------------------------|
| <b>French region, n (%)</b> |                            |                                                              |
| Auvergne-Rhône-Alpes        | 450 (14.7)                 | 6,774 (12.7)                                                 |
| Bourgogne-Franche-Comté     | 154 (5.0)                  | 2,240 (4.2)                                                  |
| Bretagne                    | 122 (4.0)                  | 2,880 (5.4)                                                  |
| Centre-Val de Loire         | 96 (3.1)                   | 1,760 (3.3)                                                  |
| Corse                       | 0 (0.0)                    | 267 (0.5)                                                    |
| Grand Est                   | 224 (7.3)                  | 4,694 (8.8)                                                  |
| Hauts-de-France             | 227 (7.4)                  | 4,907 (9.2)                                                  |
| Île-de-France               | 433 (14.1)                 | 8,161 (15.3)                                                 |
| Normandie                   | 138 (4.5)                  | 2,507 (4.7)                                                  |
| Nouvelle-Aquitaine          | 300 (9.8)                  | 5,547 (10.4)                                                 |
| Occitanie                   | 237 (7.7)                  | 5,494 (10.3)                                                 |
| Pays de la Loire            | 223 (7.3)                  | 2,934 (5.5)                                                  |
| Provence-Alpes-Côte d'Azur  | 131 (4.3)                  | 5,174 (9.7)                                                  |
| <i>Missing data</i>         | 323 (10.9)                 | <i>None</i>                                                  |

<sup>1</sup> Data from the French health insurance system (CNAMTS) (2019), see reference [17] in the manuscript.
